# Supplementary material
Source: publisher figshare collection journal article supplement (https://acs.figshare.com/ndownloader/files/3719716)
Supplement: Supplementary file 1 [file 3719716]

# Profound Understanding of Effect of Transition Metal Dopant, Sintering Temperature and $pO_2$ on the Electrical and Optical Properties of Proton Conducting $BaCe_{0.9}Sm_{0.1}O_{3-\delta}$

Hala T. Handal <sup>a,b</sup>, Azfar Hassan <sup>c</sup>, Ryan Leeson<sup>a</sup>, Sherif M. Eloui <sup>b</sup> Martin Fitzpatrick <sup>a</sup> and Venkataraman Thangadurai<sup>a,\*</sup>

<sup>a</sup> Department of Chemistry, University of Calgary, Calgary, AB, T2N 1N4 Canada

<sup>b</sup> Department of Chemistry, National Research Centre, 12622 Dokki, Cairo, Egypt

<sup>c</sup> Department of Chemical and Petroleum Engineering, University of Calgary, Calgary, AB, T2N 1N4 Canada \*Corresponding author e-mail: [vthangad@ucalgary.ca](mailto:vthangad@ucalgary.ca)

## Supporting Information

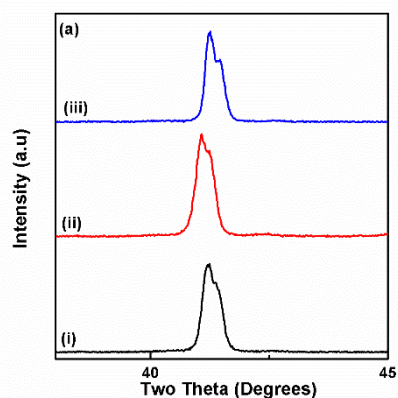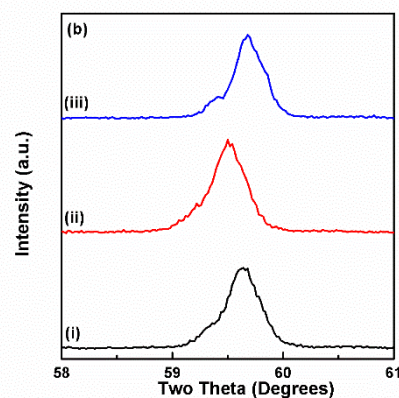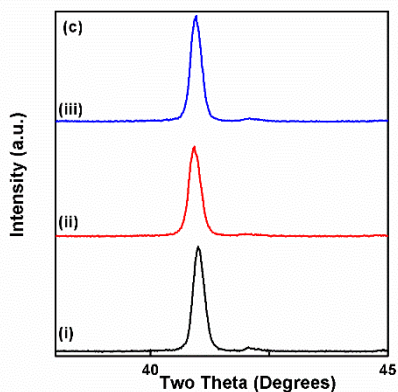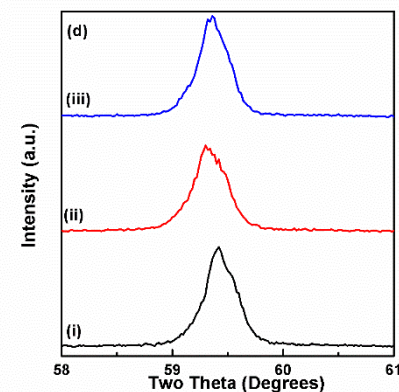

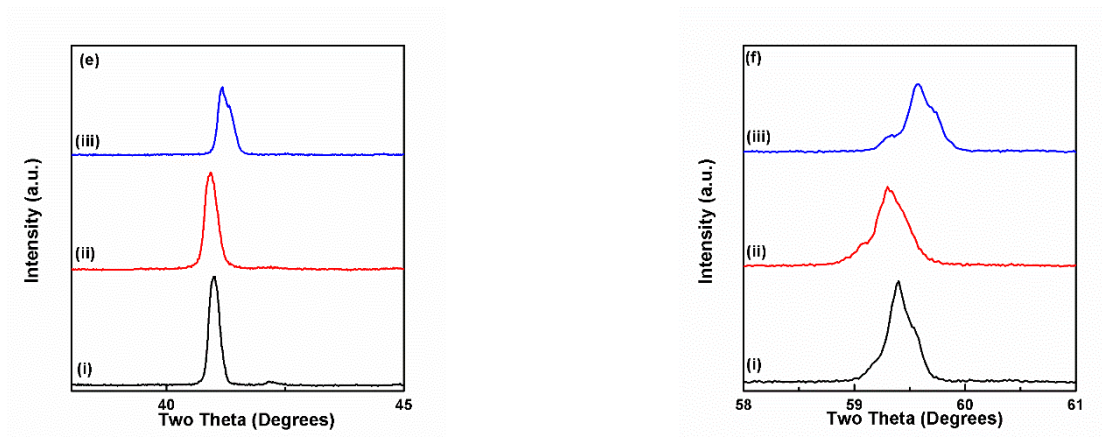

**Figure S1.** Magnified PXRD peaks at (400) and (132) for the two theta between 38-45° and 58-61° of (a,b)  $\text{BaCe}_{0.9}\text{Sm}_{0.1}\text{O}_{3-\delta}$  (BCS), (c,d)  $\text{BaCe}_{0.85}\text{Sm}_{0.1}\text{Fe}_{0.05}\text{O}_{3-\delta}$  (BCSF), and (e,f)  $\text{BaCe}_{0.85}\text{Sm}_{0.1}\text{Co}_{0.05}\text{O}_{3-\delta}$  (BCSC) samples sintered at 1200°C for 8h and followed by annealing in (i) air, (ii)  $\text{N}_2+3\%\text{H}_2\text{O}$  and (iii) dry  $\text{H}_2$  at 1000 °C/1h.

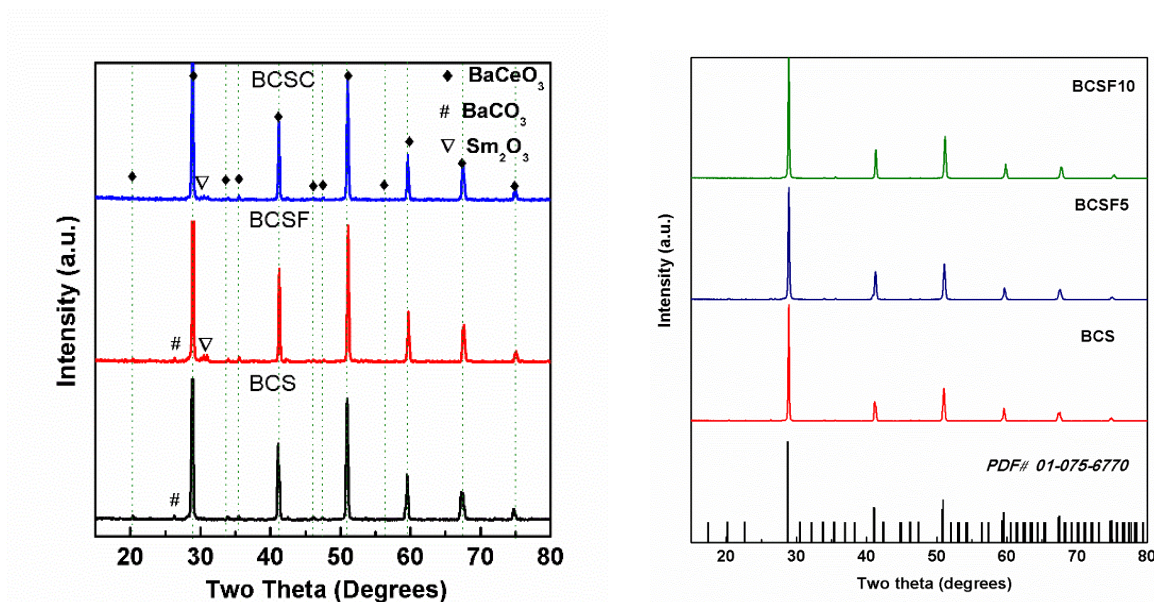

**Figure S2.** XRD patterns of samples sintered at (l.h.s.) 1300 °C/8h for BaCe<sub>0.9</sub>Sm<sub>0.1</sub>O<sub>3-δ</sub> (BCS), BaCe<sub>0.85</sub>Sm<sub>0.1</sub>Fe<sub>0.05</sub>O<sub>3-δ</sub> (BCSF), and (c) BaCe<sub>0.85</sub>Sm<sub>0.1</sub>Co<sub>0.05</sub>O<sub>3-δ</sub> (BCSC), and (r.h.s.) 1400 °C/8h in ambient air for BaCe<sub>0.9</sub>Sm<sub>0.1</sub>O<sub>3-δ</sub> (BCS), BaCe<sub>0.85</sub>Sm<sub>0.1</sub>Fe<sub>0.05</sub>O<sub>3-δ</sub> (BCSF5); BaCe<sub>0.8</sub>Sm<sub>0.1</sub>Fe<sub>0.1</sub>O<sub>3-δ</sub> (BCSF10). Phases have been recognized and indexed according to the corresponding PDF card.

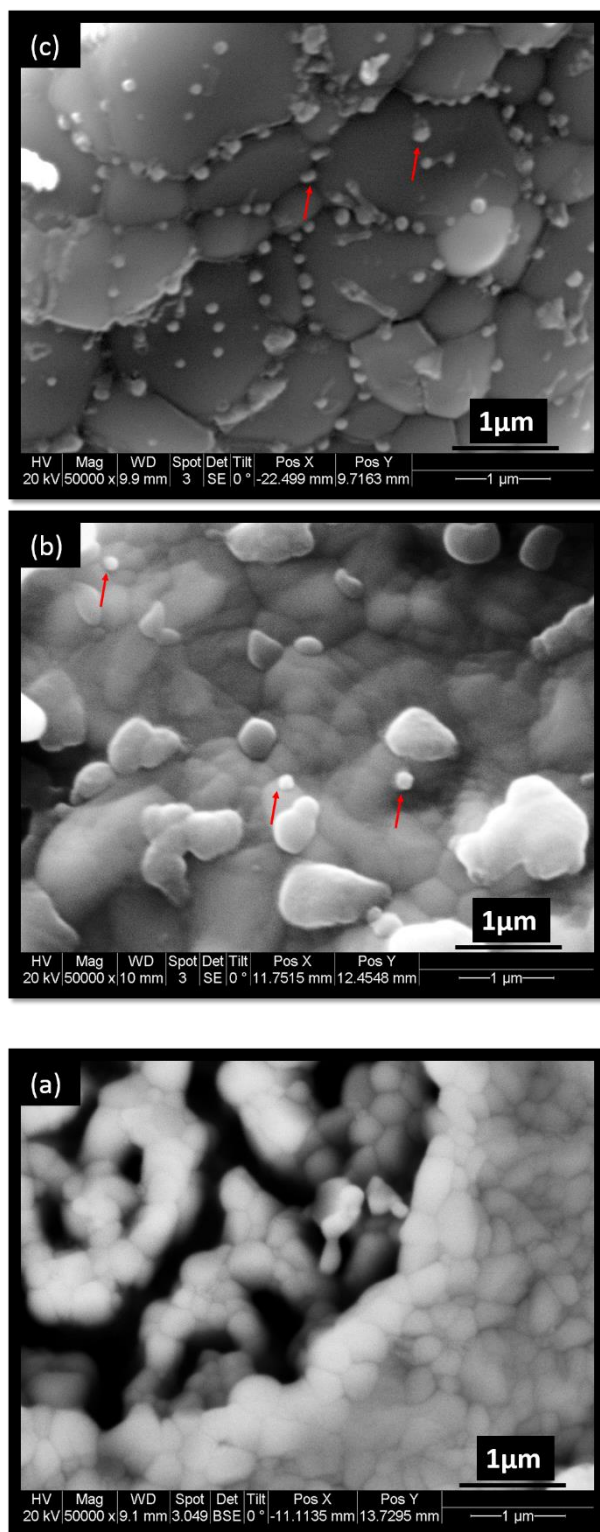

**Figure S3.** SEM images of (a) BaCe<sub>0.9</sub>Sm<sub>0.1</sub>O<sub>3-δ</sub> (BCS) (b) BaCe<sub>0.85</sub>Sm<sub>0.1</sub>Fe<sub>0.05</sub>O<sub>3-δ</sub> (BCSF5) and (c) BaCe<sub>0.85</sub>Sm<sub>0.1</sub>Co<sub>0.05</sub>O<sub>3-δ</sub> (BCSC5) powder samples sintered at 1200 °C /8h in air and subsequently reduced in dry H<sub>2</sub> at 1000 °C/1h.

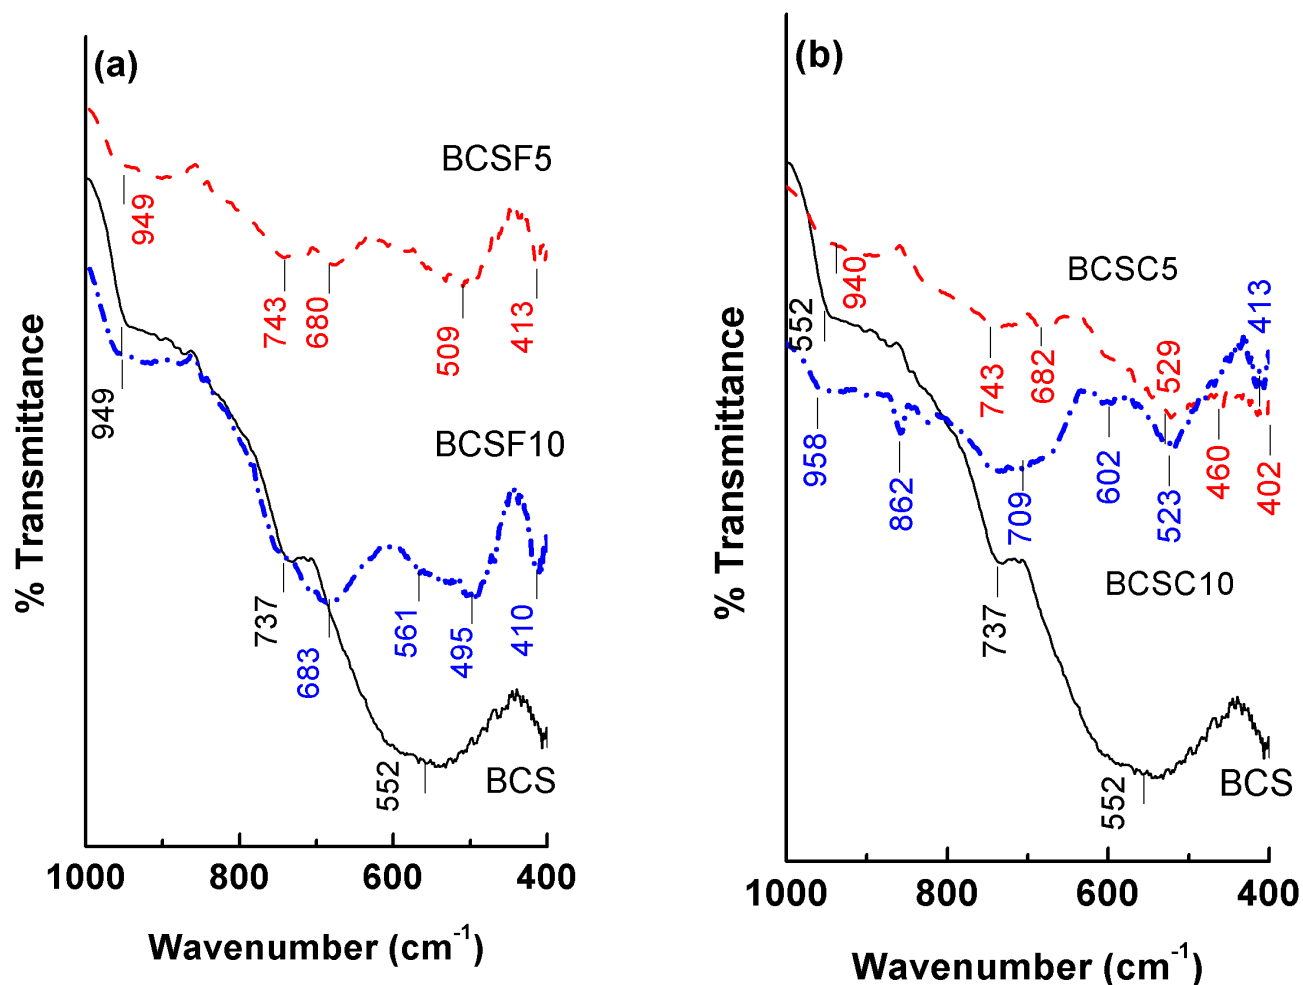

**Figure S4.** Room temperature FTIR in the region 1000- 400 $\text{cm}^{-1}$  of (a)  $\text{BaCe}_{0.9}\text{Sm}_{0.1}\text{O}_{3-\delta}$  (BCS),  $\text{BaCe}_{0.85}\text{Sm}_{0.1}\text{Fe}_{0.05}\text{O}_{3-\delta}$  (BCSF5),  $\text{BaCe}_{0.8}\text{Sm}_{0.1}\text{Fe}_{0.1}\text{O}_{3-\delta}$  (BCSF10) and (b)  $\text{BaCe}_{0.9}\text{Sm}_{0.1}\text{O}_{3-\delta}$  (BCS),  $\text{BaCe}_{0.85}\text{Sm}_{0.1}\text{Co}_{0.05}\text{O}_{3-\delta}$  (BCSC5),  $\text{BaCe}_{0.8}\text{Sm}_{0.1}\text{Co}_{0.1}\text{O}_{3-\delta}$  (BCSC10) sintered powders at 1400  $^{\circ}\text{C}/8\text{h}$ .

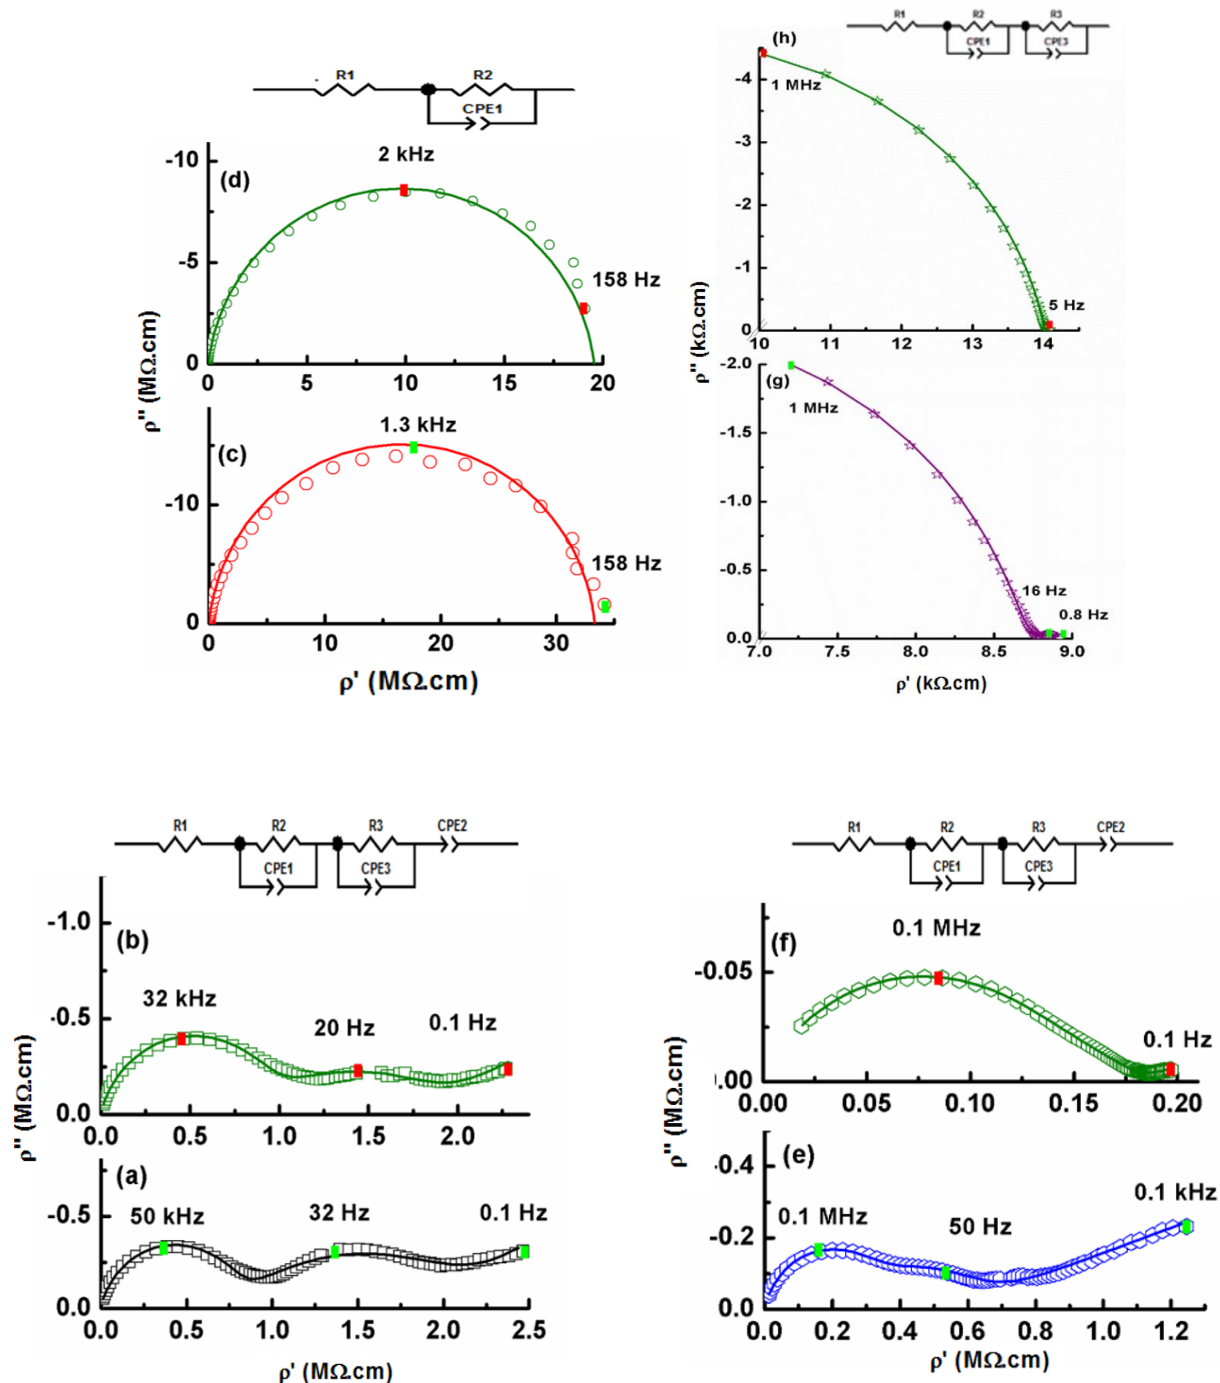

**Figure S5.** Impedance spectra of the 1400 °C sintered pellets that have the composition of (a,b)  $\text{BaCe}_{0.85}\text{Sm}_{0.1}\text{Fe}_{0.05}\text{O}_{3-\delta}$  (BCSF5), (c,d)  $\text{BaCe}_{0.8}\text{Sm}_{0.1}\text{Fe}_{0.1}\text{O}_{3-\delta}$  (BCSF10), (e,f)  $\text{BaCe}_{0.85}\text{Sm}_{0.1}\text{Co}_{0.05}\text{O}_{3-\delta}$  (BCSC5), and (g,h)  $\text{BaCe}_{0.8}\text{Sm}_{0.1}\text{Co}_{0.1}\text{O}_{3-\delta}$  (BCSC10) measured at 90 °C in air, and  $\text{H}_2 + 3\%\text{H}_2\text{O}$ , respectively. The solid line represents the best fit from applying the corresponding equivalent circuit. All the plots were normalized to both the area and the thickness.
